# Supplementary material for: Genetic modulation of oxytocin sensitivity: a pharmacogenetic approach
Source: PubMed Central journal article supplement (PMC4930136; doi:10.1038/tp.2015.163), 2015-10-27
Supplement: tp2015163x1.pdf [file tp2015163x1.pdf]

## Supplementary Information

### Emotion Recognition Task

Stimuli for the task were created using still images of three men and three women from the FACES database<sup>1</sup>. All of the images were converted into grayscale and rescaled to a standard size using Adobe Photoshop CS4 (Adobe Systems Inc., San Jose, CA, USA) and Matlab 7.7 (MathWorks Inc., Natick, MA, USA). Overall brightness and contrast were also normalized for all images. To hide hair and background, an elliptical mask (411 x 570 pixels) was overlaid over each image.

Using WinMorph 3.01 (<http://www.debugmode/winmorph>), facial images of individuals displaying neutral expressions were morphed into images of the same individuals displaying full-intensity emotional expressions (happy, angry, fearful, and angry). In total, images of three men and three women were converted into stimuli for 24 test trials (6 individuals x 4 emotions). Each trial consisted of a sequence of 100 still images that appeared to participants as a dynamic emotional expression transitioning smoothly from 0% to 100% intensity over 8 seconds.

Images were presented on a grey background and a 20" monitor (30.6 x 40.8 cm, resolution 1024 x 768 pixels) at a viewing distance of 55 cm. Before the 24 test trials, participants completed four practice trials, for which images from the FACES database of another individual displaying the four target emotions were used. The test trials appeared in one of two pseudo-randomized testing orders. For each trial, reaction time and accuracy were recorded.

1. Ebner NC, Riediger M, Lindenberger U. FACES--a database of facial expressions in young, middle-aged, and older women and men: development and validation. *Behav Res Methods* 2010; **42**:351-62.

**Supplementary Table 1:** 23 SNPs across the *OXTR* gene region were analyzed. 10 were excluded from further analyses because of deviation from Hardy-Weinberg Equilibrium (cut-off  $p < .05$ ; SNPs 3, 14, 15, 18, 19, 22, 23), minor allele frequency (MAF) below 5% (SNPs 4 & 20), or genotyping failure (SNP 8). SNPs included in the association test are shown in bold.

|    | rs number         | chr position   | Alleles           | MAF          | HWE<br>p value | % Genotyped  |
|----|-------------------|----------------|-------------------|--------------|----------------|--------------|
| 1  | <b>rs237917</b>   | <b>8812699</b> | <b>C/T</b>        | <b>0.296</b> | <b>0.149</b>   | <b>96.0</b>  |
| 2  | <b>rs2268498</b>  | <b>8812411</b> | <b>T/C</b>        | <b>0.470</b> | <b>0.956</b>   | <b>99.0</b>  |
| 3  | rs3806675         | 8811646        | T/C               | 0.428        | 0.029          | 80.4         |
| 4  | rs73132859        | 8811394        | G/C               | 0.036        | 1.0            | 98.5         |
| 5  | <b>rs4564970</b>  | <b>8810408</b> | <b>G/C</b>        | <b>0.106</b> | <b>0.175</b>   | <b>99.5</b>  |
| 6  | <b>rs237897</b>   | <b>8808285</b> | <b>G/A</b>        | <b>0.432</b> | <b>0.317</b>   | <b>100.0</b> |
| 7  | <b>rs2268495</b>  | <b>8807535</b> | <b>G/A</b>        | <b>0.216</b> | <b>0.783</b>   | <b>100.0</b> |
| 8  | rs237894          | 8806531        | failed genotyping |              |                |              |
| 9  | <b>rs53576</b>    | <b>8804371</b> | <b>G/A</b>        | <b>0.36</b>  | <b>0.528</b>   | <b>99.0</b>  |
| 10 | <b>rs13316193</b> | <b>8802743</b> | <b>T/C</b>        | <b>0.389</b> | <b>0.894</b>   | <b>100.0</b> |
| 11 | <b>rs237889</b>   | <b>8802483</b> | <b>C/T</b>        | <b>0.346</b> | <b>0.182</b>   | <b>94.5</b>  |
| 12 | <b>rs2254298</b>  | <b>8802228</b> | <b>G/A</b>        | <b>0.106</b> | <b>0.175</b>   | <b>99.5</b>  |
| 13 | <b>rs2268494</b>  | <b>8802046</b> | <b>T/A</b>        | <b>0.056</b> | <b>0.921</b>   | <b>99.5</b>  |
| 14 | rs2268492         | 8800672        | C/T               | 0.286        | 0.023          | 93.0         |
| 15 | rs4686301         | 8798586        | C/T               | 0.342        | 0.045          | 100.0        |
| 16 | <b>rs9840864</b>  | <b>8798477</b> | <b>G/C</b>        | <b>0.218</b> | <b>0.604</b>   | <b>99.0</b>  |
| 17 | <b>rs237887</b>   | <b>8797042</b> | <b>A/G</b>        | <b>0.379</b> | <b>0.116</b>   | <b>99.5</b>  |
| 18 | rs11706648        | 8796547        | A/C               | 0.36         | 0.007          | 93.5         |
| 19 | rs237885          | 8795543        | T/G               | 0.426        | <.05           | 50.8         |
| 20 | rs2139184         | 8795494        | C/A               | 0.008        | 1.0            | 100.0        |
| 21 | <b>rs1042778</b>  | <b>8794545</b> | <b>G/T</b>        | <b>0.437</b> | <b>0.578</b>   | <b>99.0</b>  |
| 22 | rs6770632         | 8793724        | C/A               | 0.394        | <.05           | 68.8         |
| 23 | rs9872310         | 8793381        | A/G               | 0.138        | 0.035          | 100.0        |



**Supplementary Table 3:** Global p-value, permutation corrected global p-value (shown in brackets), and individual p-values for haplotypes of sizes 5 to 2. p-values for individual SNPs are shown at the bottom of the table.

|          | Haplotype                                                                       | Frequency | Chi <sup>2</sup> | p            |
|----------|---------------------------------------------------------------------------------|-----------|------------------|--------------|
|          | <b>rs237917 - rs2268498 - rs4564970 - rs237897 - rs2268495</b>                  |           |                  |              |
|          | Likelihood ratio $\chi^2 = 14.74$ , df=5, global p-value = <b>0.012 (0.046)</b> |           |                  |              |
|          | C-C-G-A-G                                                                       | 0.356     | 6.984            | <b>0.008</b> |
|          | C-T-G-G-G                                                                       | 0.214     | 0.043            | 0.835        |
|          | T-T-G-G-A                                                                       | 0.156     | 3.127            | 0.077        |
|          | T-T-C-G-G                                                                       | 0.076     | 6.519            | <b>0.011</b> |
|          | C-C-G-G-A                                                                       | 0.067     | 0.908            | 0.341        |
|          | T-T-G-A-G                                                                       | 0.054     | 0.845            | 0.358        |
|          | <b>rs2268498 - rs4564970 - rs237897 - rs2268495 – rs53576</b>                   |           |                  |              |
|          | Likelihood ratio $\chi^2 = 15.29$ , df=6, global p-value = <b>0.018 (0.032)</b> |           |                  |              |
| Window 5 | C-G-A-G-A                                                                       | 0.279     | 7.845            | <b>0.005</b> |
|          | T-G-G-G-G                                                                       | 0.213     | 0.072            | 0.788        |
|          | T-G-G-A-G                                                                       | 0.156     | 2.831            | 0.092        |
|          | T-C-G-G-G                                                                       | 0.089     | 7.270            | <b>0.007</b> |
|          | C-G-A-G-G                                                                       | 0.076     | 0.115            | 0.734        |
|          | C-G-G-A-G                                                                       | 0.067     | 0.954            | 0.329        |
|          | T-G-A-G-A                                                                       | 0.061     | 0.542            | 0.462        |
|          | <b>rs4564970 - rs237897 - rs2268495 – rs53576 – rs13316193</b>                  |           |                  |              |
|          | Likelihood ratio $\chi^2 = 17.14$ , df=7, global p-value = <b>0.017 (0.043)</b> |           |                  |              |
|          | G-A-G-A-T                                                                       | 0.290     | 5.565            | <b>0.018</b> |
|          | G-G-A-G-C                                                                       | 0.164     | 1.739            | 0.183        |
|          | G-G-G-G-T                                                                       | 0.155     | 0.047            | 0.829        |
|          | G-G-G-G-C                                                                       | 0.091     | 0.344            | 0.557        |
|          | C-G-G-G-T                                                                       | 0.070     | 7.432            | <b>0.006</b> |
|          | G-G-A-G-T                                                                       | 0.057     | 3.389            | 0.066        |
|          | G-A-G-G-C                                                                       | 0.056     | 1.003            | 0.317        |

|          | Haplotype                                                                       | Frequency | Chi <sup>2</sup> | p            |
|----------|---------------------------------------------------------------------------------|-----------|------------------|--------------|
| Window 4 | <b>rs2268498 - rs4564970 - rs237897 - rs2268495</b>                             |           |                  |              |
|          | Likelihood ratio $\chi^2 = 16.13$ , df=5, global p-value = <b>0.006 (0.026)</b> |           |                  |              |
|          | C-G-A-G                                                                         | 0.355     | 7.842            | <b>0.005</b> |
|          | T-G-G-G                                                                         | 0.218     | 0.001            | 0.973        |
|          | T-G-G-A                                                                         | 0.155     | 2.626            | 0.105        |
|          | T-C-G-G                                                                         | 0.091     | 7.551            | <b>0.006</b> |
|          | C-G-G-A                                                                         | 0.067     | 0.952            | 0.329        |
|          | T-G-A-G                                                                         | 0.066     | 1.467            | 0.226        |
|          | <b>rs4564970 - rs237897 - rs2268495 - rs53576</b>                               |           |                  |              |
|          | Likelihood ratio $\chi^2 = 14.83$ , df=4, global p-value = <b>0.005 (0.031)</b> |           |                  |              |
|          | G-A-G-A                                                                         | 0.347     | 7.630            | <b>0.006</b> |
|          | G-G-G-G                                                                         | 0.241     | 0.061            | 0.804        |
| G-G-A-G  | 0.217                                                                           | 4.136     | <b>0.041</b>     |              |
| C-G-G-G  | 0.010                                                                           | 6.440     | <b>0.011</b>     |              |
| G-A-G-G  | 0.082                                                                           | 0.488     | 0.485            |              |
| Window 3 | <b>rs237917 - rs2268498 - rs4564970</b>                                         |           |                  |              |
|          | Likelihood ratio $\chi^2 = 9.90$ , df=3, global p-value = <b>0.019 (0.021)</b>  |           |                  |              |
|          | C-C-G                                                                           | 0.458     | 4.888            | <b>0.027</b> |
|          | C-T-G                                                                           | 0.227     | 0.295            | 0.587        |
|          | T-T-G                                                                           | 0.210     | 3.178            | 0.075        |
|          | T-T-C                                                                           | 0.082     | 5.299            | <b>0.021</b> |
|          | <b>rs2268498 - rs4564970 - 237897</b>                                           |           |                  |              |
|          | Likelihood ratio $\chi^2 = 14.40$ , df=4, global p-value = <b>0.006 (0.030)</b> |           |                  |              |
|          | T-G-G                                                                           | 0.374     | 1.665            | 0.197        |
|          | C-G-A                                                                           | 0.356     | 7.450            | <b>0.006</b> |
|          | C-G-G                                                                           | 0.10      | 0.270            | 0.603        |

|       |       |       |              |
|-------|-------|-------|--------------|
| T-C-G | 0.092 | 7.669 | <b>0.006</b> |
| T-G-A | 0.066 | 1.368 | 0.242        |

**rs4564970 – rs237897 – rs2268495**

Likelihood ratio  $\chi^2 = 14.66$ , df=3, global p-value = **0.002 (0.005)**

|       |       |       |              |
|-------|-------|-------|--------------|
| G-A-G | 0.421 | 9.805 | <b>0.002</b> |
| G-G-G | 0.252 | 0.010 | 0.917        |
| G-G-A | 0.223 | 3.867 | <b>0.049</b> |
| C-G-G | 0.104 | 6.387 | <b>0.012</b> |

**rs237897 – rs2268495 – rs53576**

Likelihood ratio  $\chi^2 = 10.01$  df=3, global p-value = **0.018 (0.023)**

|       |       |       |              |
|-------|-------|-------|--------------|
| G-G-G | 0.344 | 1.866 | 0.170        |
| A-G-A | 0.341 | 7.610 | <b>0.006</b> |
| G-A-G | 0.223 | 4.104 | <b>0.043</b> |
| A-G-G | 0.080 | 0.500 | 0.481        |

**rs2254298 – rs2268494 – rs9840864**

Likelihood ratio  $\chi^2 = 8.23$  df=3, global p-value = **0.042 (0.046)**

|       |       |       |              |
|-------|-------|-------|--------------|
| G-T-G | 0.771 | 0.336 | 0.562        |
| A-T-C | 0.093 | 6.269 | <b>0.012</b> |
| G-T-C | 0.070 | 2.386 | 0.122        |
| G-A-C | 0.060 | 0.151 | 0.697        |

Window 2

| Haplotype                                                                      | Frequency | Chi <sup>2</sup> | p            |
|--------------------------------------------------------------------------------|-----------|------------------|--------------|
| <b>rs237917 - rs2268498</b>                                                    |           |                  |              |
| Likelihood ratio $\chi^2 = 8.43$ , df=2, global p-value = <b>0.015 (0.012)</b> |           |                  |              |
| C-C                                                                            | 0.469     | 5.493            | <b>0.019</b> |
| T-T                                                                            | 0.291     | 7.691            | <b>0.006</b> |
| C-T                                                                            | 0.241     | 0.039            | 0.844        |

**rs2268498 - rs4564970**

Likelihood ratio  $\chi^2 = 10.02$ , df=2, global p-value = **0.007 (0.021)**

|     |       |       |              |
|-----|-------|-------|--------------|
| C-G | 0.456 | 6.059 | <b>0.014</b> |
| T-G | 0.439 | 0.913 | 0.339        |
| T-C | 0.091 | 7.098 | <b>0.008</b> |

**rs4564970 - rs237897**

Likelihood ratio  $\chi^2 = 12.87$ , df=2, global p-value = **0.002 (0.007)**

|     |       |       |              |
|-----|-------|-------|--------------|
| G-G | 0.474 | 2.400 | 0.121        |
| G-A | 0.421 | 9.805 | <b>0.002</b> |
| C-G | 0.104 | 6.387 | <b>0.012</b> |

**rs237897 - rs2268495**

Likelihood ratio  $\chi^2 = 10.33$ , df=2, global p-value = **0.006 (0.003)**

|     |       |       |              |
|-----|-------|-------|--------------|
| A-G | 0.422 | 9.832 | <b>0.002</b> |
| G-G | 0.355 | 2.340 | 0.126        |
| G-A | 0.223 | 3.848 | <b>0.050</b> |

| Single SNPs | rs number | MAF   | Chi <sup>2</sup> | p            |
|-------------|-----------|-------|------------------|--------------|
|             | rs237917  | 0.296 | 7.026            | <b>0.008</b> |
|             | rs2268498 | 0.470 | 5.763            | <b>0.017</b> |
|             | rs4564970 | 0.106 | 9.832            | <b>0.002</b> |
|             | rs237897  | 0.432 | 3.863            | <b>0.049</b> |
|             | rs53576   | 0.216 | 5.980            | <b>0.014</b> |
|             | rs2254298 | 0.106 | 5.680            | <b>0.017</b> |
